# Supplementary material for: A pilot optical coherence tomography angiography classification of retinal neovascularization in retinopathy of prematurity
Source: PubMed Central journal article supplement (PMC10766630; doi:10.1038/s41598-023-49964-8), 2024-01-04
Supplement: 41598_2023_49964_MOESM1_ESM.pdf [file 41598_2023_49964_MOESM1_ESM.pdf]

## **BabySTEPS Group**

### **(Analysis of Retinal Microanatomy in Retinopathy of Prematurity to Improve Care Study Group)**

#### **Duke University:**

**Principal Investigator:** Cynthia A. Toth, MD

**Co-investigators:** Xi Chen, MD, PhD; Charles M. Cotten, MD; Maysantoine El-Dairi, MD; Sina Farsiu, PhD; Sharon F. Freedman, MD; Hesham Gabr, MD; Sara Grace, MD; Kathryn E. Gustafson, PhD; Majda Hadziahmetovic, MD; Joseph Izatt, PhD; Ramiro Maldonado, MD; Suzanne Michalak, MD; Matthew O'Sullivan, MD, PhD; Sally Ong, MD; Miroslav Pajik, PhD; Carolyn Pizoli, MD; S. Grace Prakalapakorn, MD; Joan Roberts, MD; Rolake Alabi, MD, PhD; Nita Valikodath, MD; Lejla Vajzovic, MD; Christian Viehland, PhD; David Wallace, MD; Xiao Yi Zhou, MD

**Research Scholars:** Shwetha Mangalesh, MBBS; Vahid Ownagh, MD

**Senior Research Program Lead:** Michelle McCall, BA, MCAPM

**Research Program Leads:** Joanne Finkle, RN, JD; Neeru Sarin, MBBS

**OCT Imagers:** Alexandria Dandridge; Ryan Imperio, BS; William Raynor, BS; Du Tran-Viet, BS

**Data Analysts:** Stephanie Chiu, PhD; Heena Divecha, MS; Bo Hansen, MSE; Vincent Tai, MSE; Katrina P. Winter, BS

**NPRU Director:** Kimberly Fisher, PhD, FMP-BC

**Coordinators:** Lacey Andrews, BS; Melissa Babilonia-Rosa, PhD; Anne Baez Love, BS; Lucy DeStefano-Pearce, MA; Jessicka Hamilton, BA; Grace Jefferson, MS; Amanda Marion, BS; Isabella Pallotto, MPH; Marito Passero, BS; Caitlin Stone, MA; Michelle Sunico, BS

**Undergraduate Students:** Caelan Eckard, BS; Karthik Ganesan, BS; Xiao Tang, MS; Kira Wang, BA; Brittany Wong, BS

**Graduate Students:** Mark Draelos, MD, PhD; Francesco LaRocca, PhD; Amit Narewane, BSE; Qitong Gao, MS

**Medical Students:** Isaac Bleicher, MD; Pujan Patel, MD; Jay Rathinavelu, BSE; Kai Seely, MD, MHS; Mason Seely, BS

#### **University of Pennsylvania:**

**Principal Investigator:** Maureen G. Maguire, PhD (3/2016 – 2/2021); Gui-Shuang Ying, PhD (5/2021 – present)

**Co-Investigator:** Gui-Shuang Ying, PhD (3/2016 – 2/2021)

**Statisticians:** Brendan McGeehan, MS; Jocelyn He, MS

#### **Washington University:**

**Principal Investigator:** Joshua Shimony, MD, PhD

**Other study personnel:** Dimitrios Alexopoulos, MS; Sydney Kaplan, BS; Jeanette Kenley, BS; Kayla Hannon, BS

#### **Data Safety and Monitoring Committee:**

**Chair:** P. Brian Smith, MD, MPH, MHS, Duke University (6/2016 – present)

**DSMC Members:** Michael O'Shea, MD, MPH, University of North Carolina (7/2016 – 6/2021); Subashri Kurgatt, PhD, Duke University (7/2016 – 11/2020); Daniel X. Hammer, PhD, Food and Drug Administration (5/2021 – present); William Good, MD, Smith Kettlewell Eye Institute (5/2021 – present)
