# Supplementary material for: A pilot optical coherence tomography angiography classification of retinal neovascularization in retinopathy of prematurity
Source: PubMed Central journal article supplement (PMC10766630; doi:10.1038/s41598-023-49964-8), 2024-01-04
Supplement: 41598_2023_49964_MOESM2_ESM.pdf [file 41598_2023_49964_MOESM2_ESM.pdf]

**A pilot optical coherence tomography angiography classification of retinal neovascularization in retinopathy of prematurity**

Xi Chen, Ryan Imperio, Christian Viehland, Pujan R. Patel, Du Tran-Viet, Shwetha Mangalesh, S. Grace Prakalapakorn, Sharon F. Freedman, Joseph A. Izatt, BabySTEPS group and Cynthia A. Toth

**Supplementary Table 1.** Demographics and Clinical Characteristics of the Included Subjects

|                       | <b>TR-ROP group<br/>(7 infants)</b> | <b>Non-TR-ROP group<br/>(6 infants)</b> |
|-----------------------|-------------------------------------|-----------------------------------------|
| <b>GA</b>             | 22 - 26 weeks                       | 24 - 34 weeks                           |
| <b>Birth weight</b>   | 420 - 780 g                         | 610 - 1415 g                            |
| <b>PMA at imaging</b> | 32 – 47 weeks                       | 36 - 49 weeks                           |
| <b>Ethnicity</b>      | 7/7 non-Hispanic                    | 5/6 non-Hispanic                        |
| <b>Race</b>           | 3/7 black; 4/7 white                | 2/6 black; 4/6 white                    |
| <b>Sex</b>            | 5/7 male; 2/7 female                | 3/6 male; 3/6 female                    |

\*GA: gestational age; PMA: postmenstrual age; ROP: retinopathy of prematurity; TR-ROP: treatment-requiring ROP
